# Supplementary material for: Ultrashort Self-Assembling Peptide Hydrogel for the Treatment of Fungal Infections
Source: Preprints.org preprint supplement (doi:10.20944/preprints201805.0093.v1), 2018-05-04
Supplement: Supplementary file 1 [file supplementary]

Supplementary material for

**Ultrashort self-assembling peptide hydrogel for the treatment of fungal infections**

**Alyaa Albadr, Sophie M Coulter, Raghu Raj Singh Thakur and Garry Laverty 1***

Biofunctional Nanomaterials Group, School of Pharmacy, Queen’s University Belfast, Medical Biology Centre, 97 Lisburn Road, Belfast, N. Ireland, BT97BL.

**Contents**

Figure S1. *Candida albicans* NCYC 610 fungal viability counts…………………………....S2

Figure S2. *Candida dubliniensis* NDC19 fungal viability counts…………………………....S2

Figure S3. *Candida glabrata* ATCC 90030 fungal viability counts…………………………S3

Figure S4. ARPE-19 human retinal pigmented epithelium cells (ATCC CRL-2302) viability……..S4

Figure S5. Haemolysis……………………………………………………………………….S5

Figure S6. Optical images of cell morphology NCTC 929…………………………………..S6


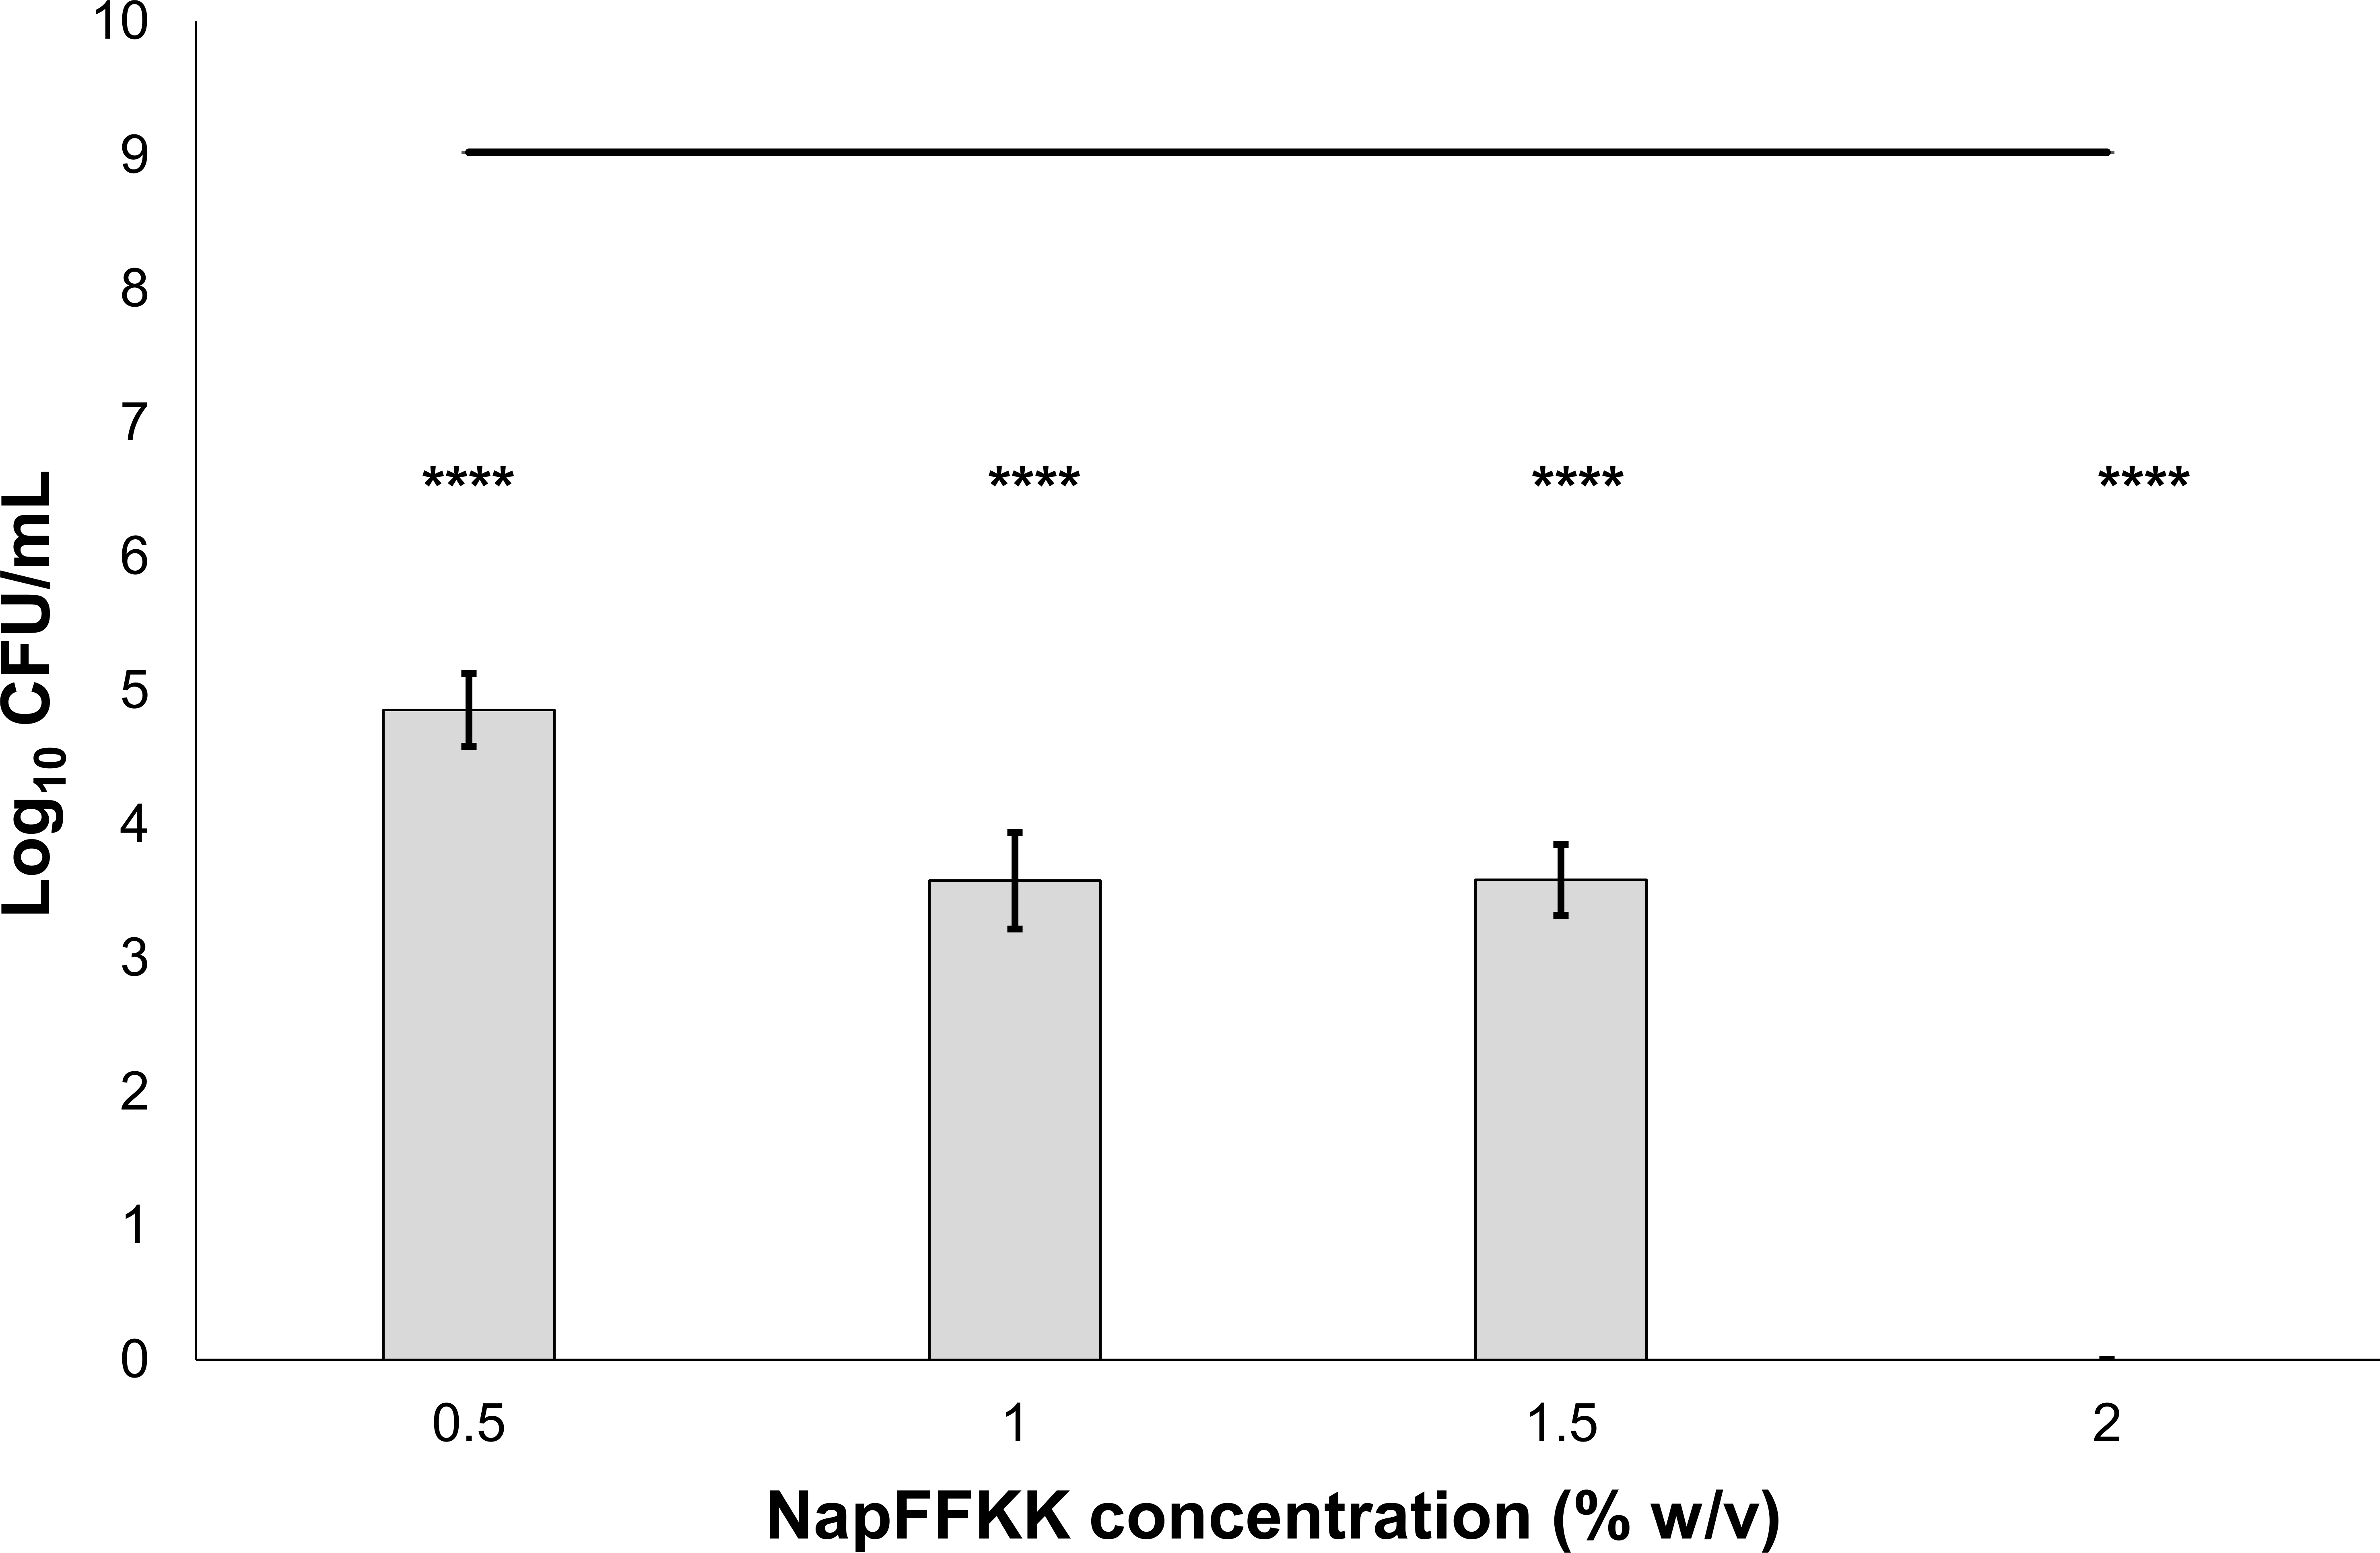
Figure S1. Fungal viability counts (Log10 CFU/mL) of *Candida albicans* NCYC 610after 24 hours exposure to NapFFKK-OH. Black line represents negative growth control (fungi only). ****: p<0.0001 significant difference between Log10 CFU/mL NapFFKK-OH treatment and the negative control.


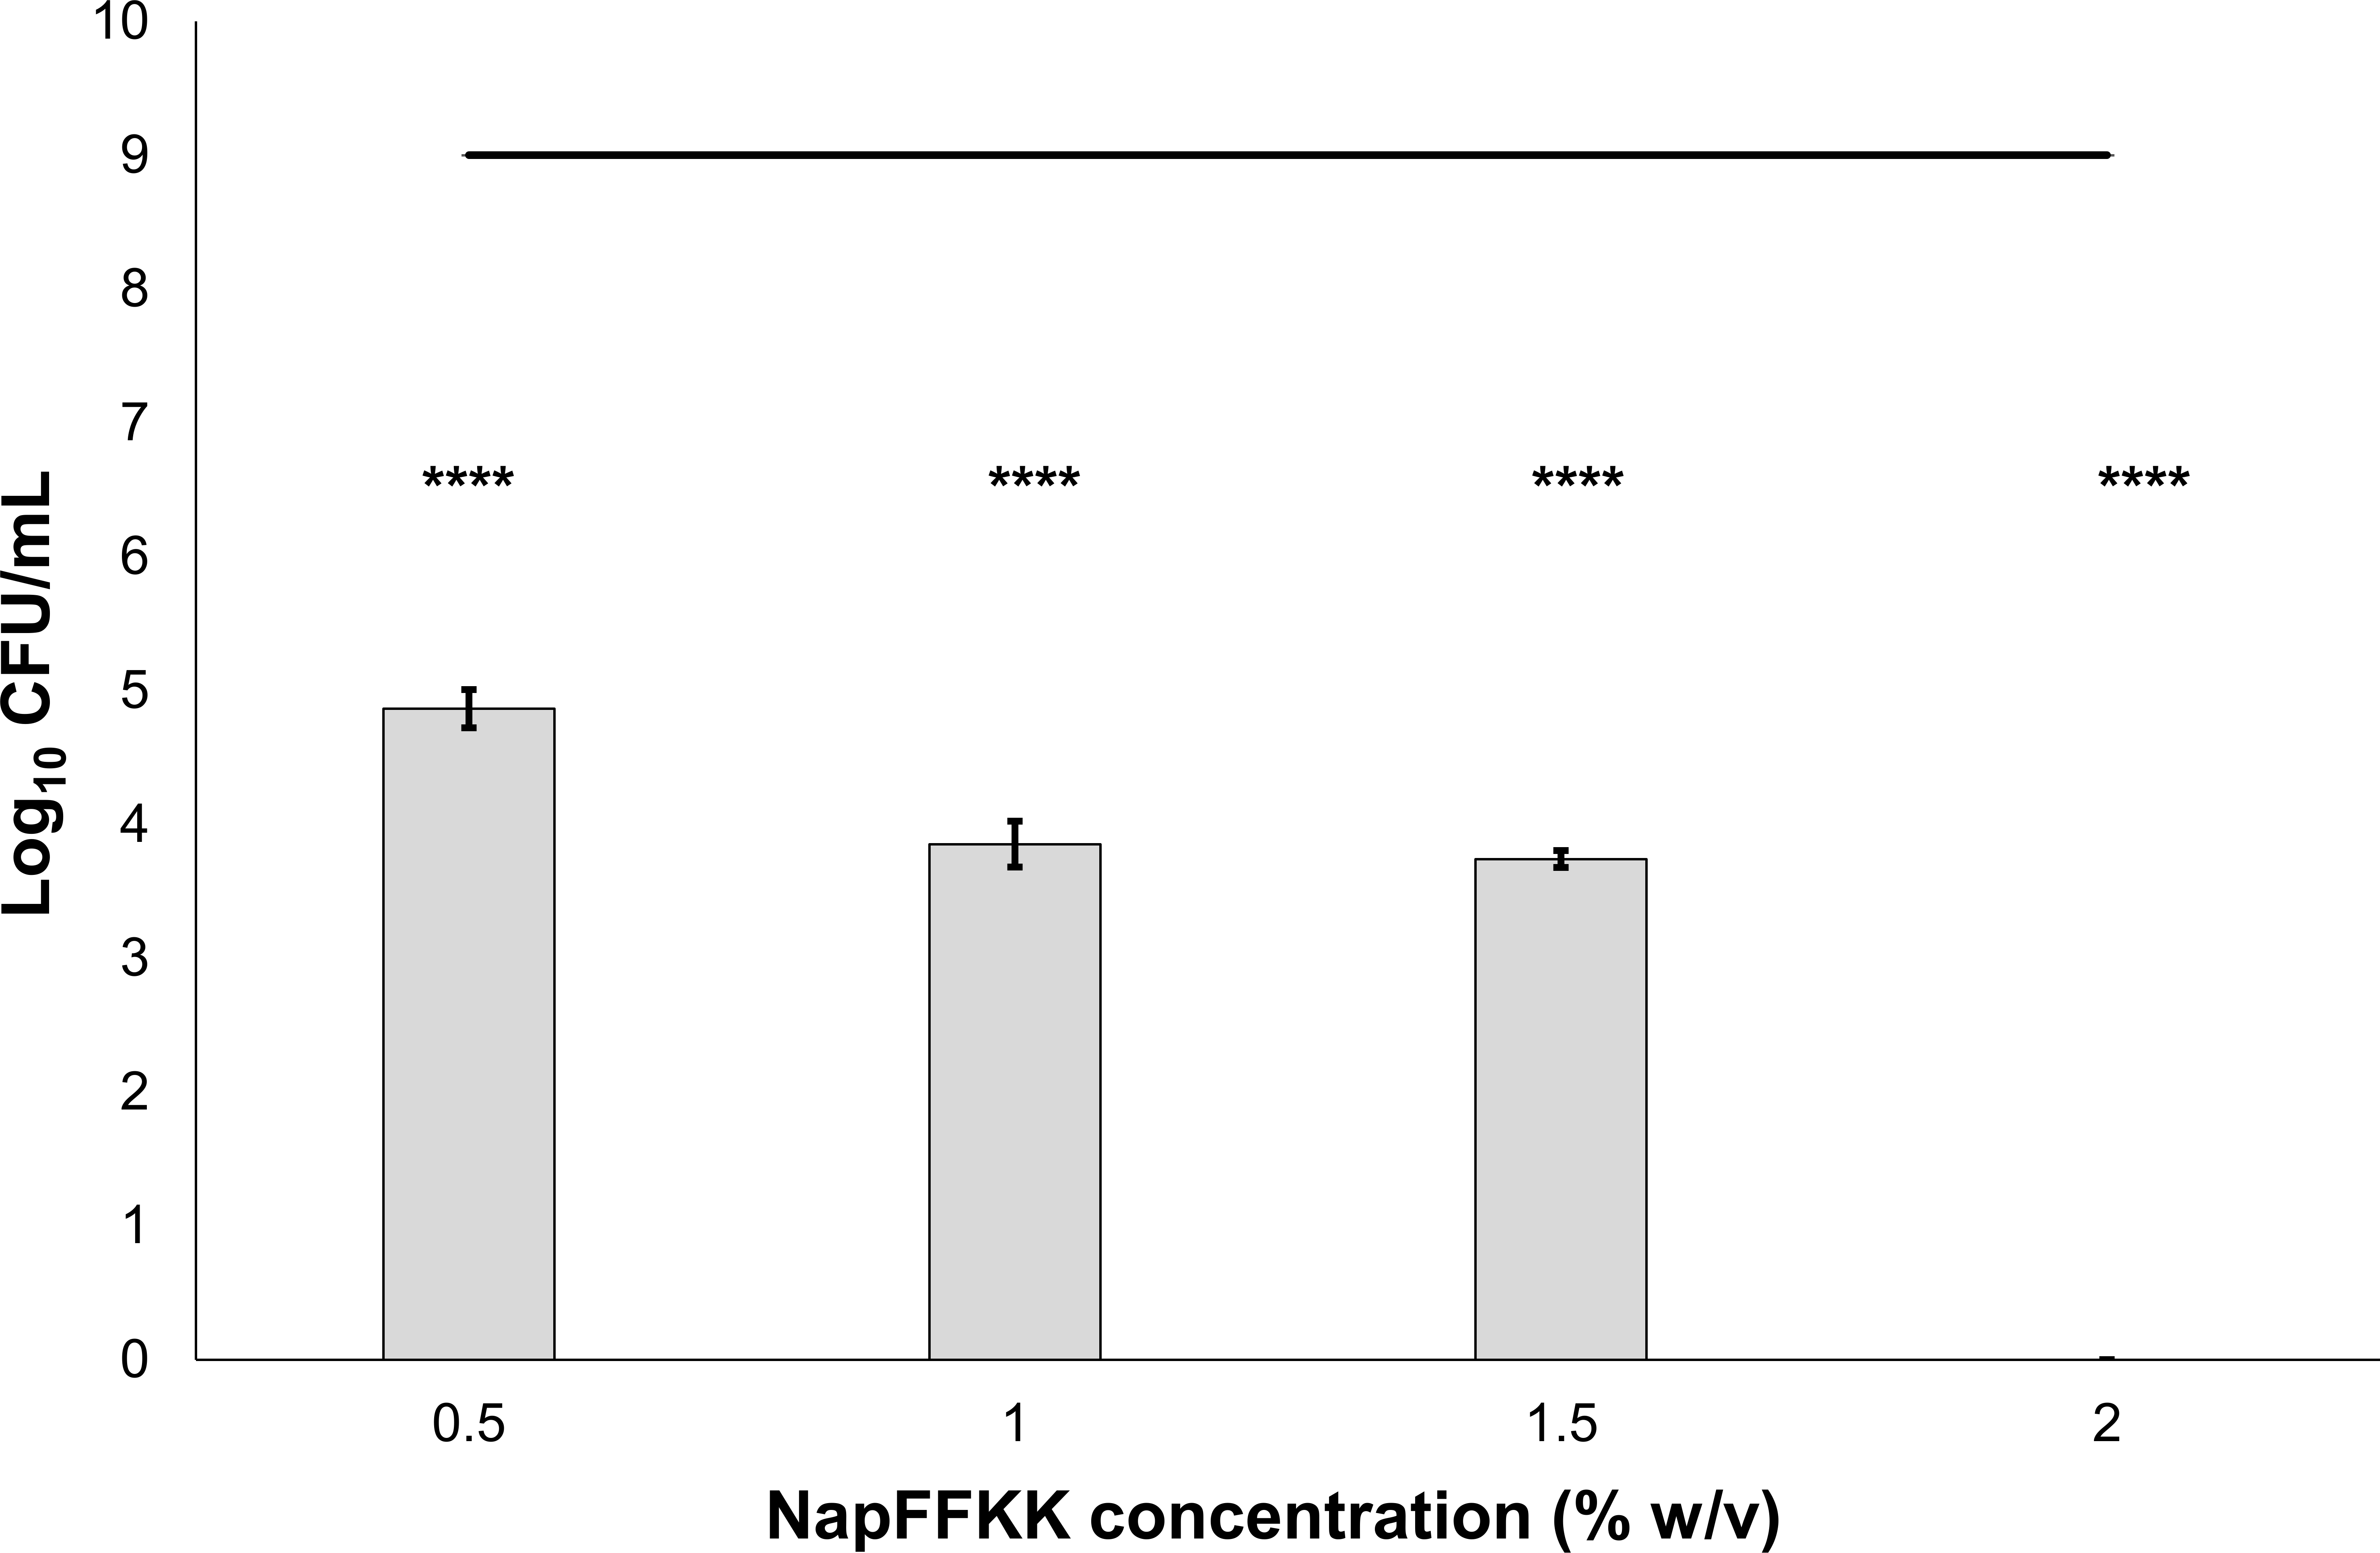
Figure S2. Fungal viability counts (Log10 CFU/mL) of *Candida dubliniensis* NDC19after 24 hours exposure to NapFFKK-OH. Black line represents negative growth control (fungi only). ****: p<0.0001 significant difference between Log10 CFU/mL NapFFKK-OH treatment and the negative control.


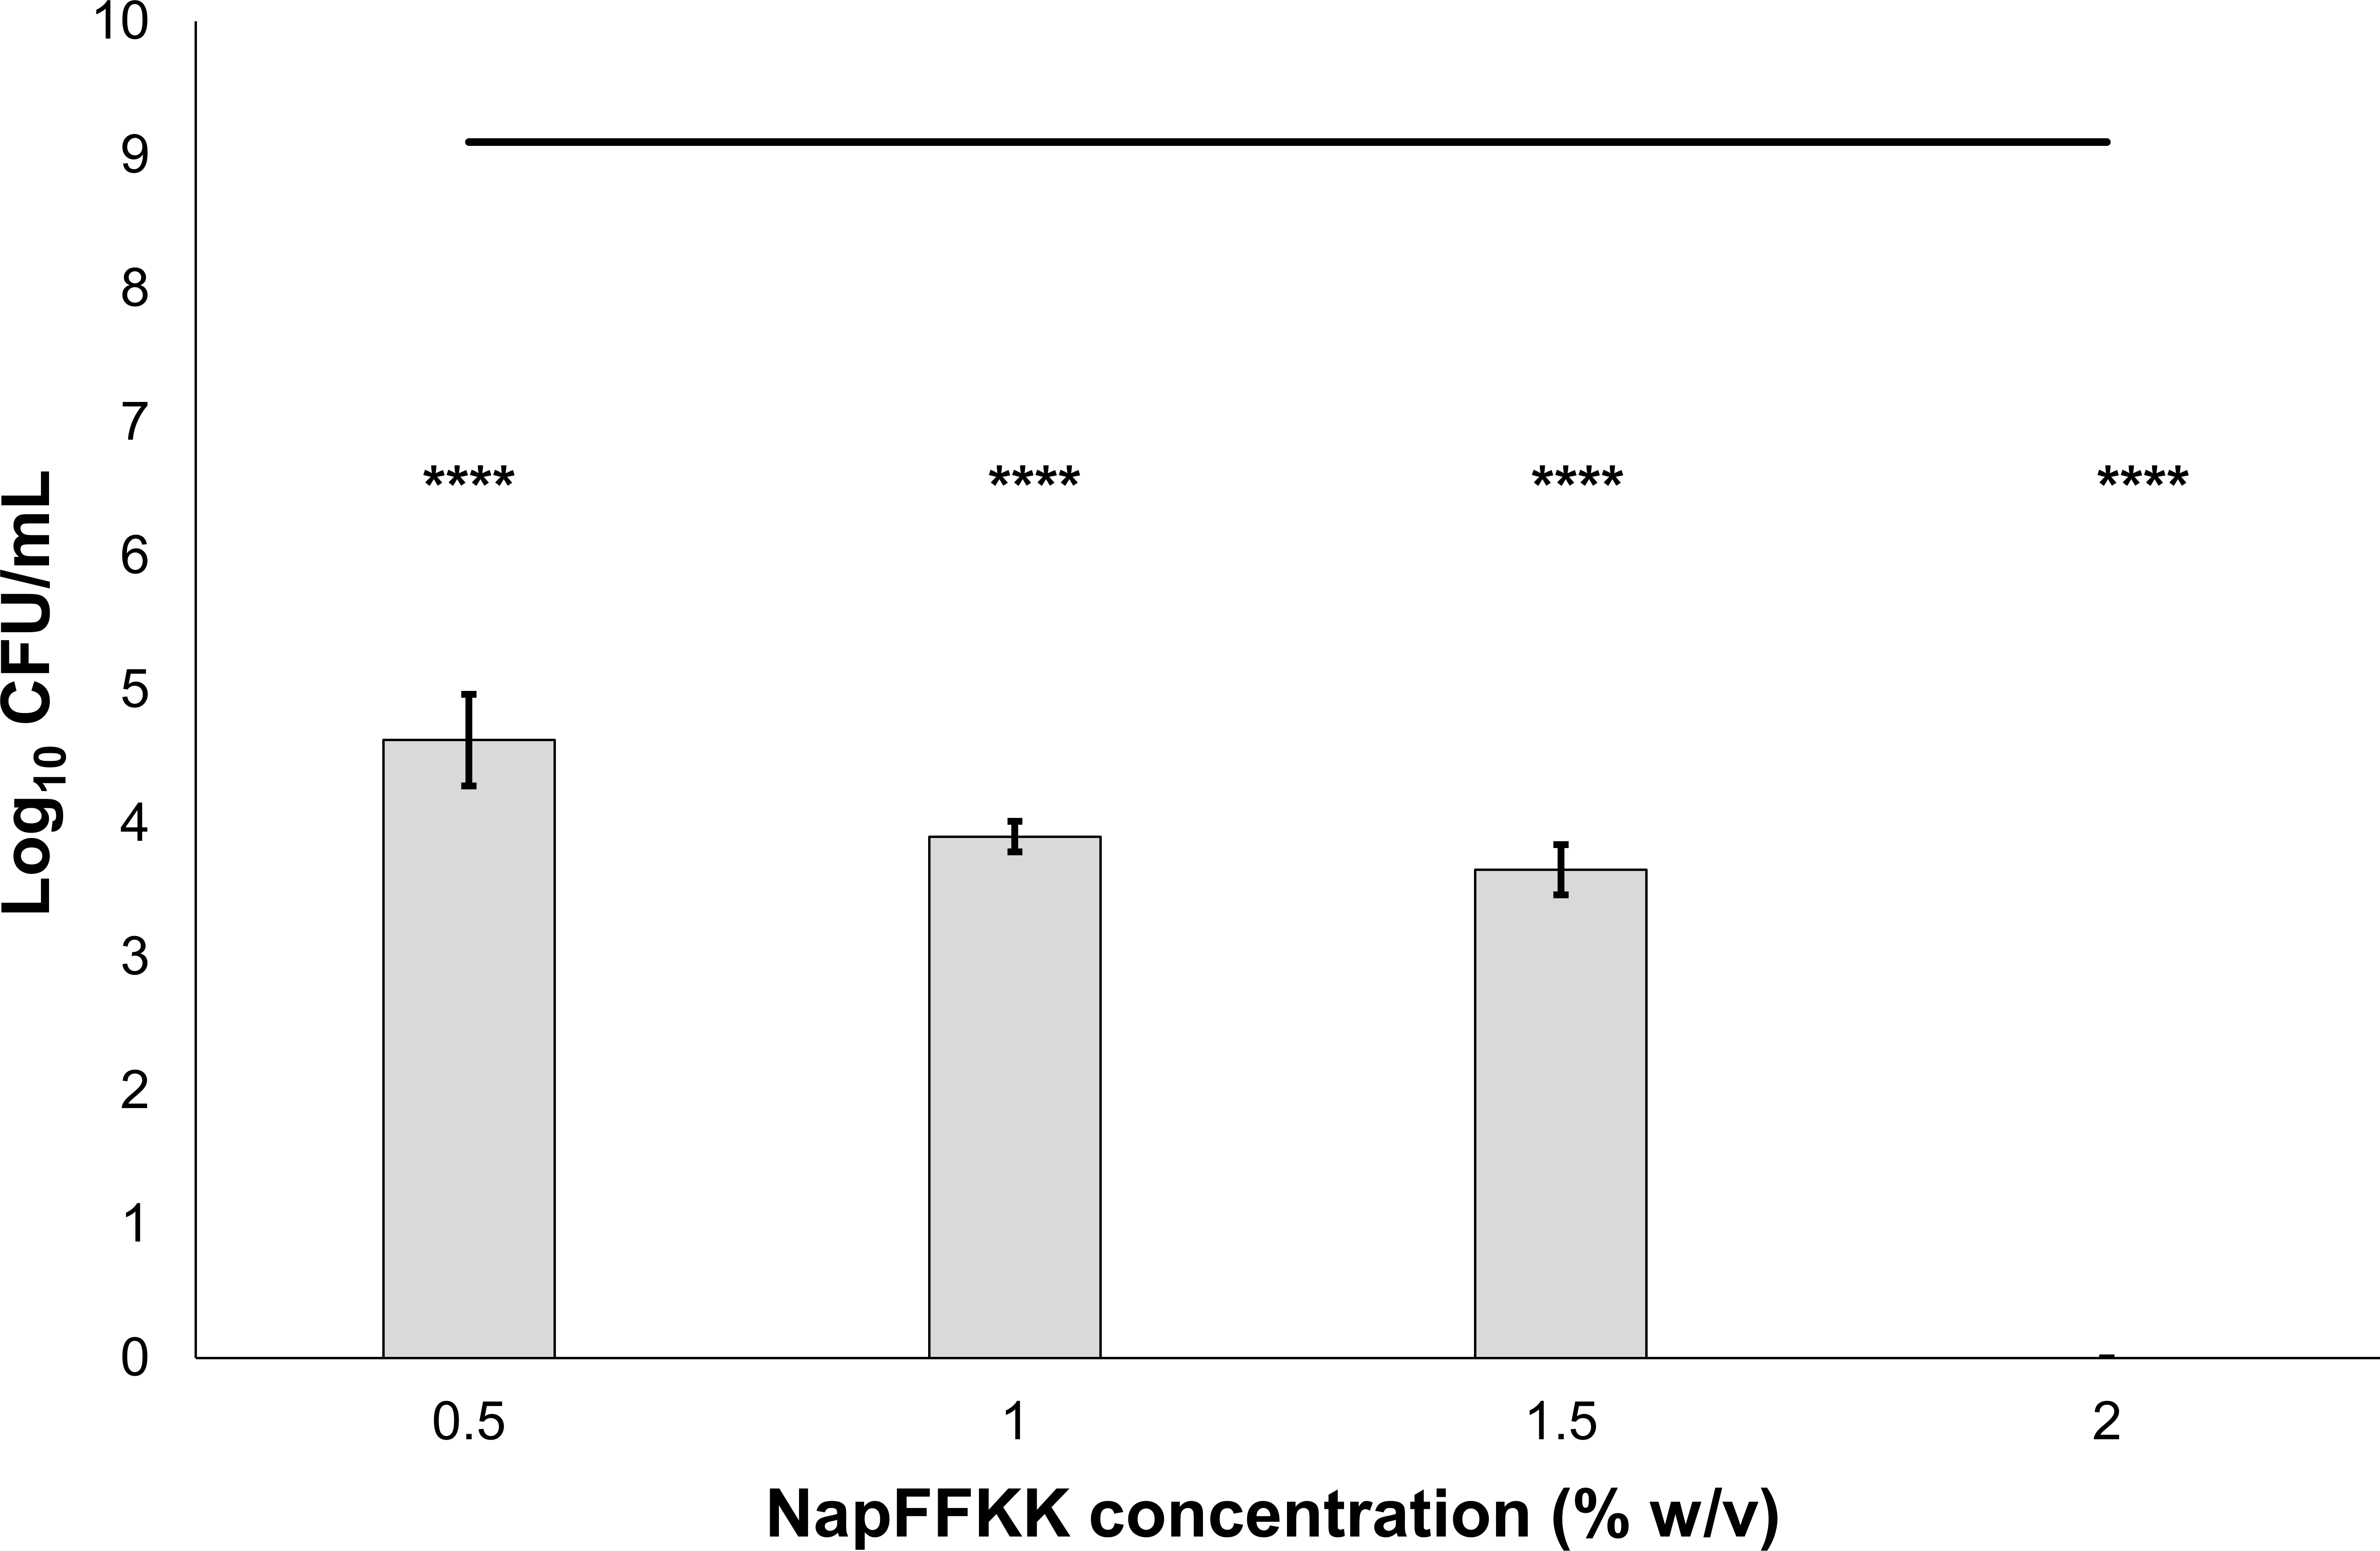
Figure S3. Fungal viability counts (Log10 CFU/mL) of *Candida glabrata* ATCC 90030 after 24 hours exposure to NapFFKK-OH. Black line represents negative growth control (fungi only). ****: p<0.0001 significant difference between Log10 CFU/mL NapFFKK-OH treatment and the negative control.


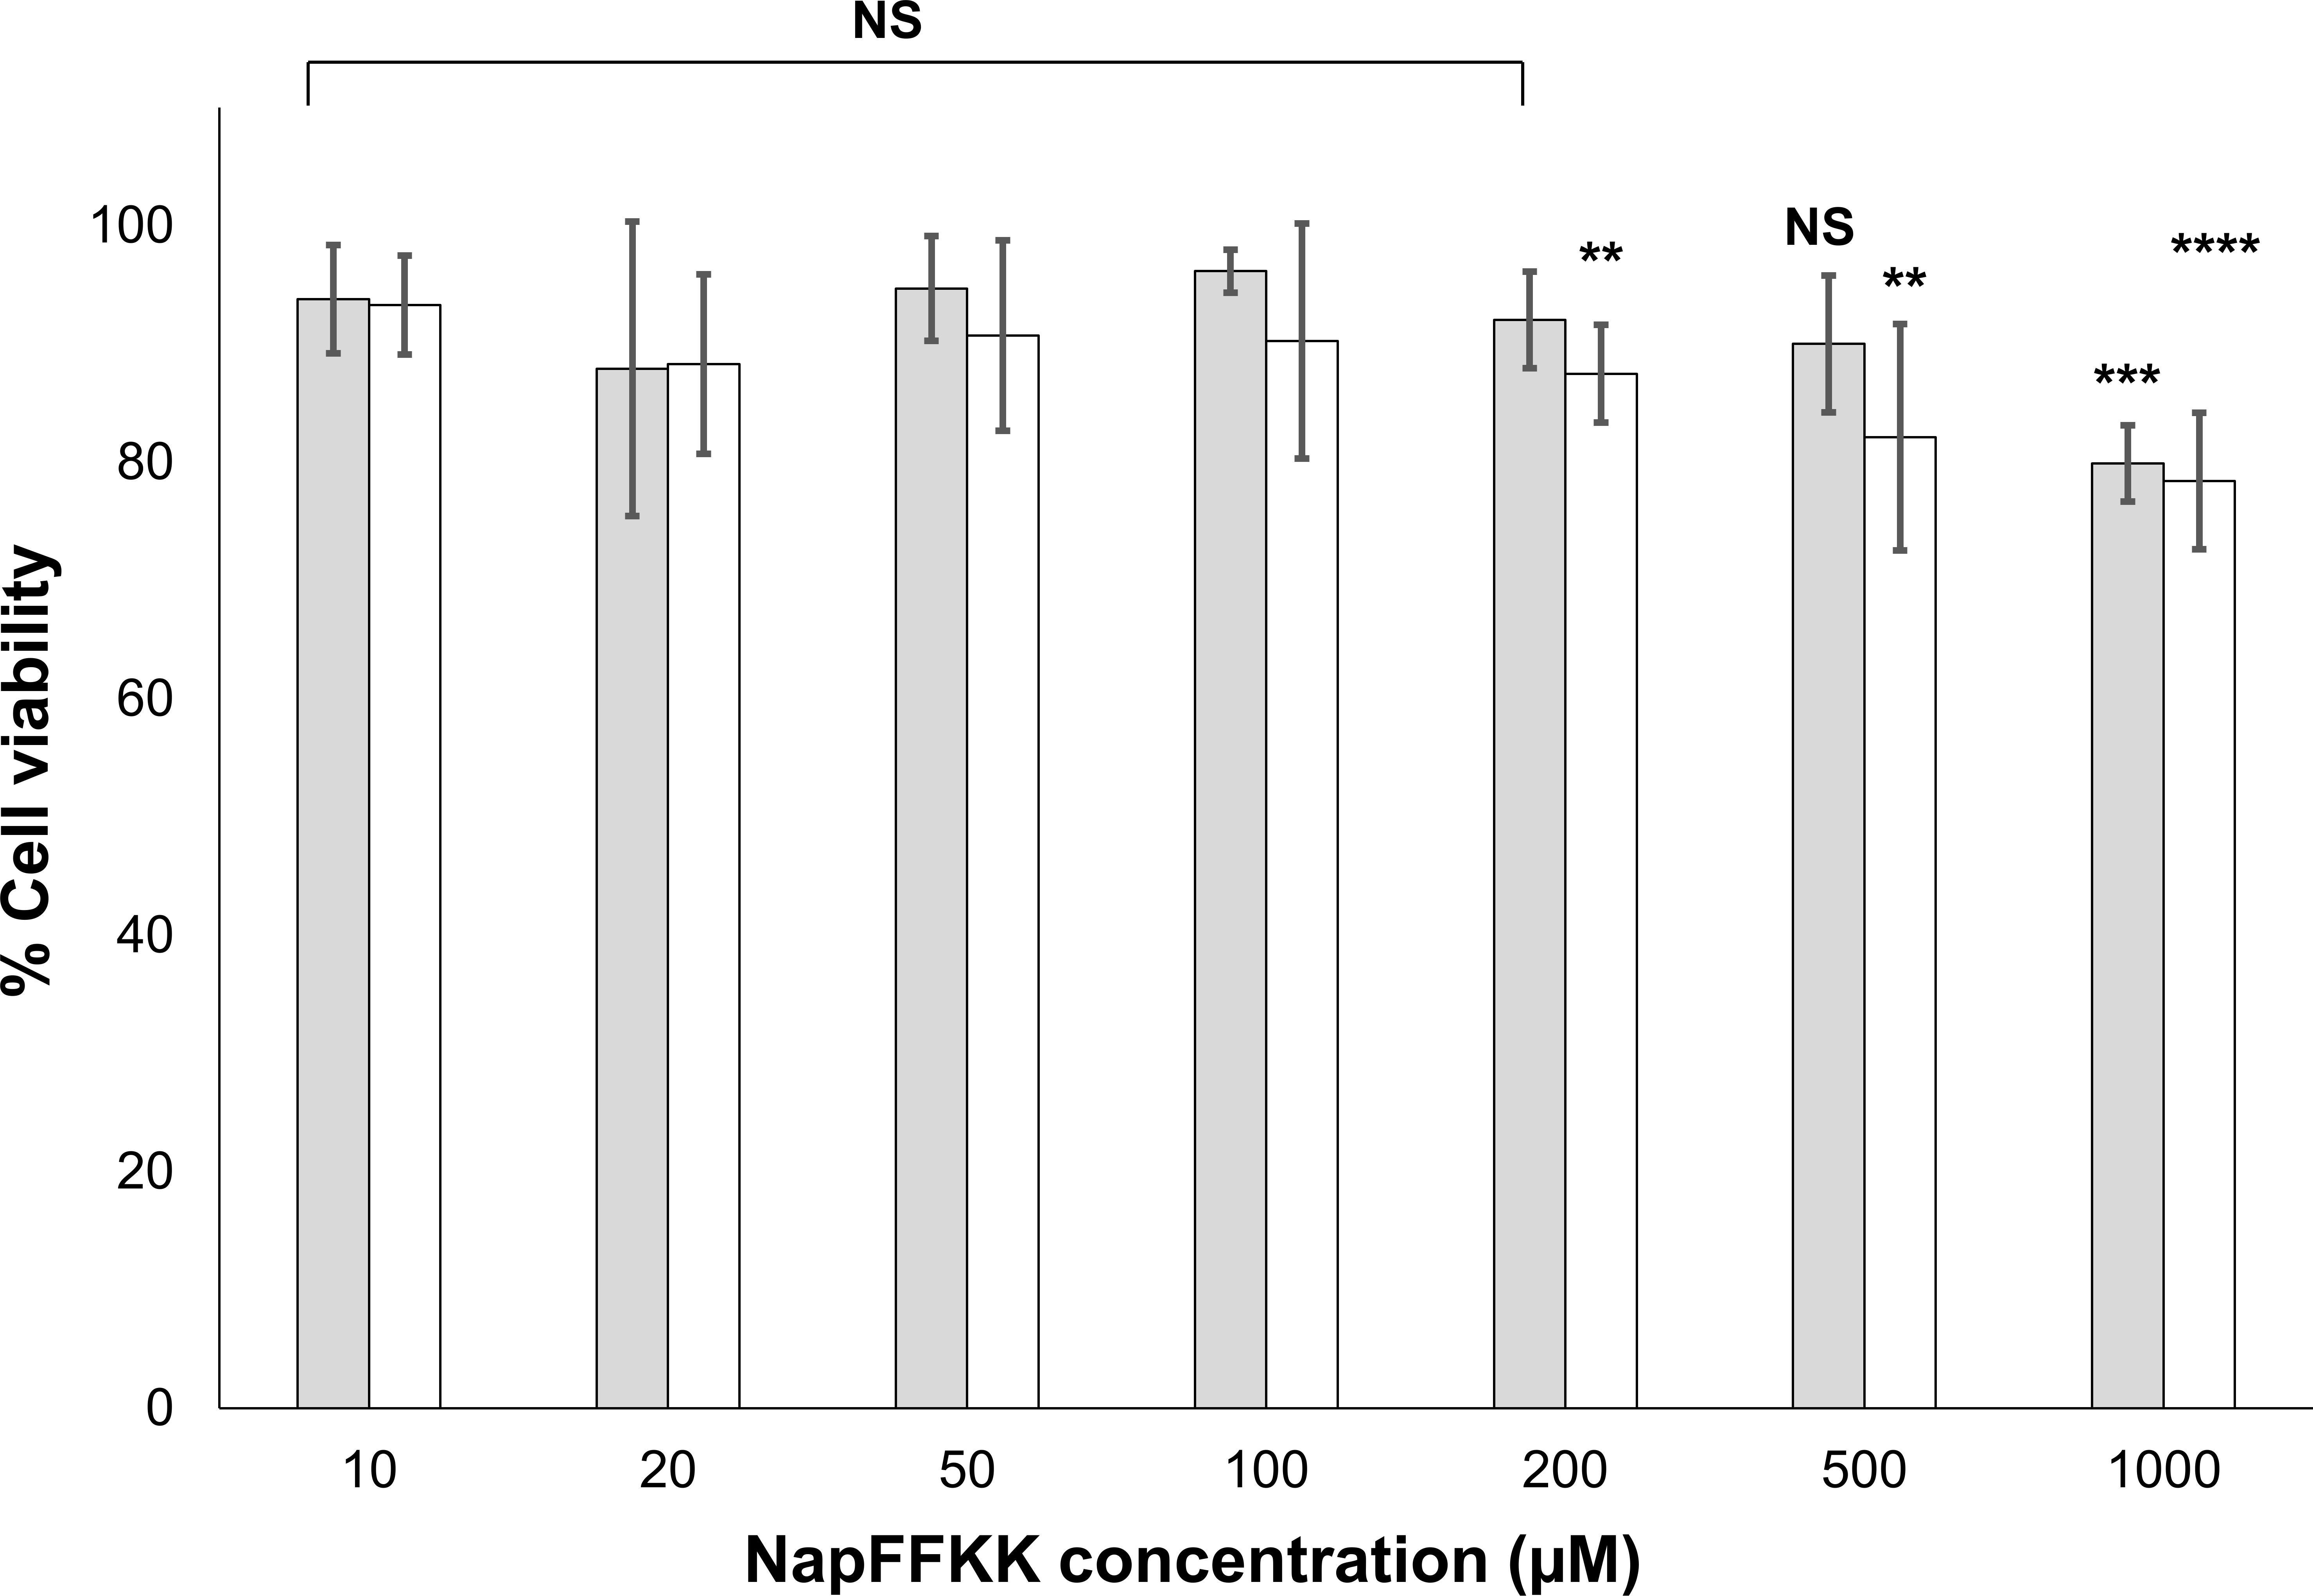
Figure S4. Percentage cell viability of ARPE-19 retinal pigmented epithelium cells (ATCC CRL-2302) after 24 hour (grey column) and 48 hour (white) exposure to varying concentrations of NapFFKK-OH. NS: no significant (p≥0.05), *: p<0.05, **: p<0.01, ***: p<0.001 ****: p<0.0001 difference between NapFFKK-OH treatment and the negative control.


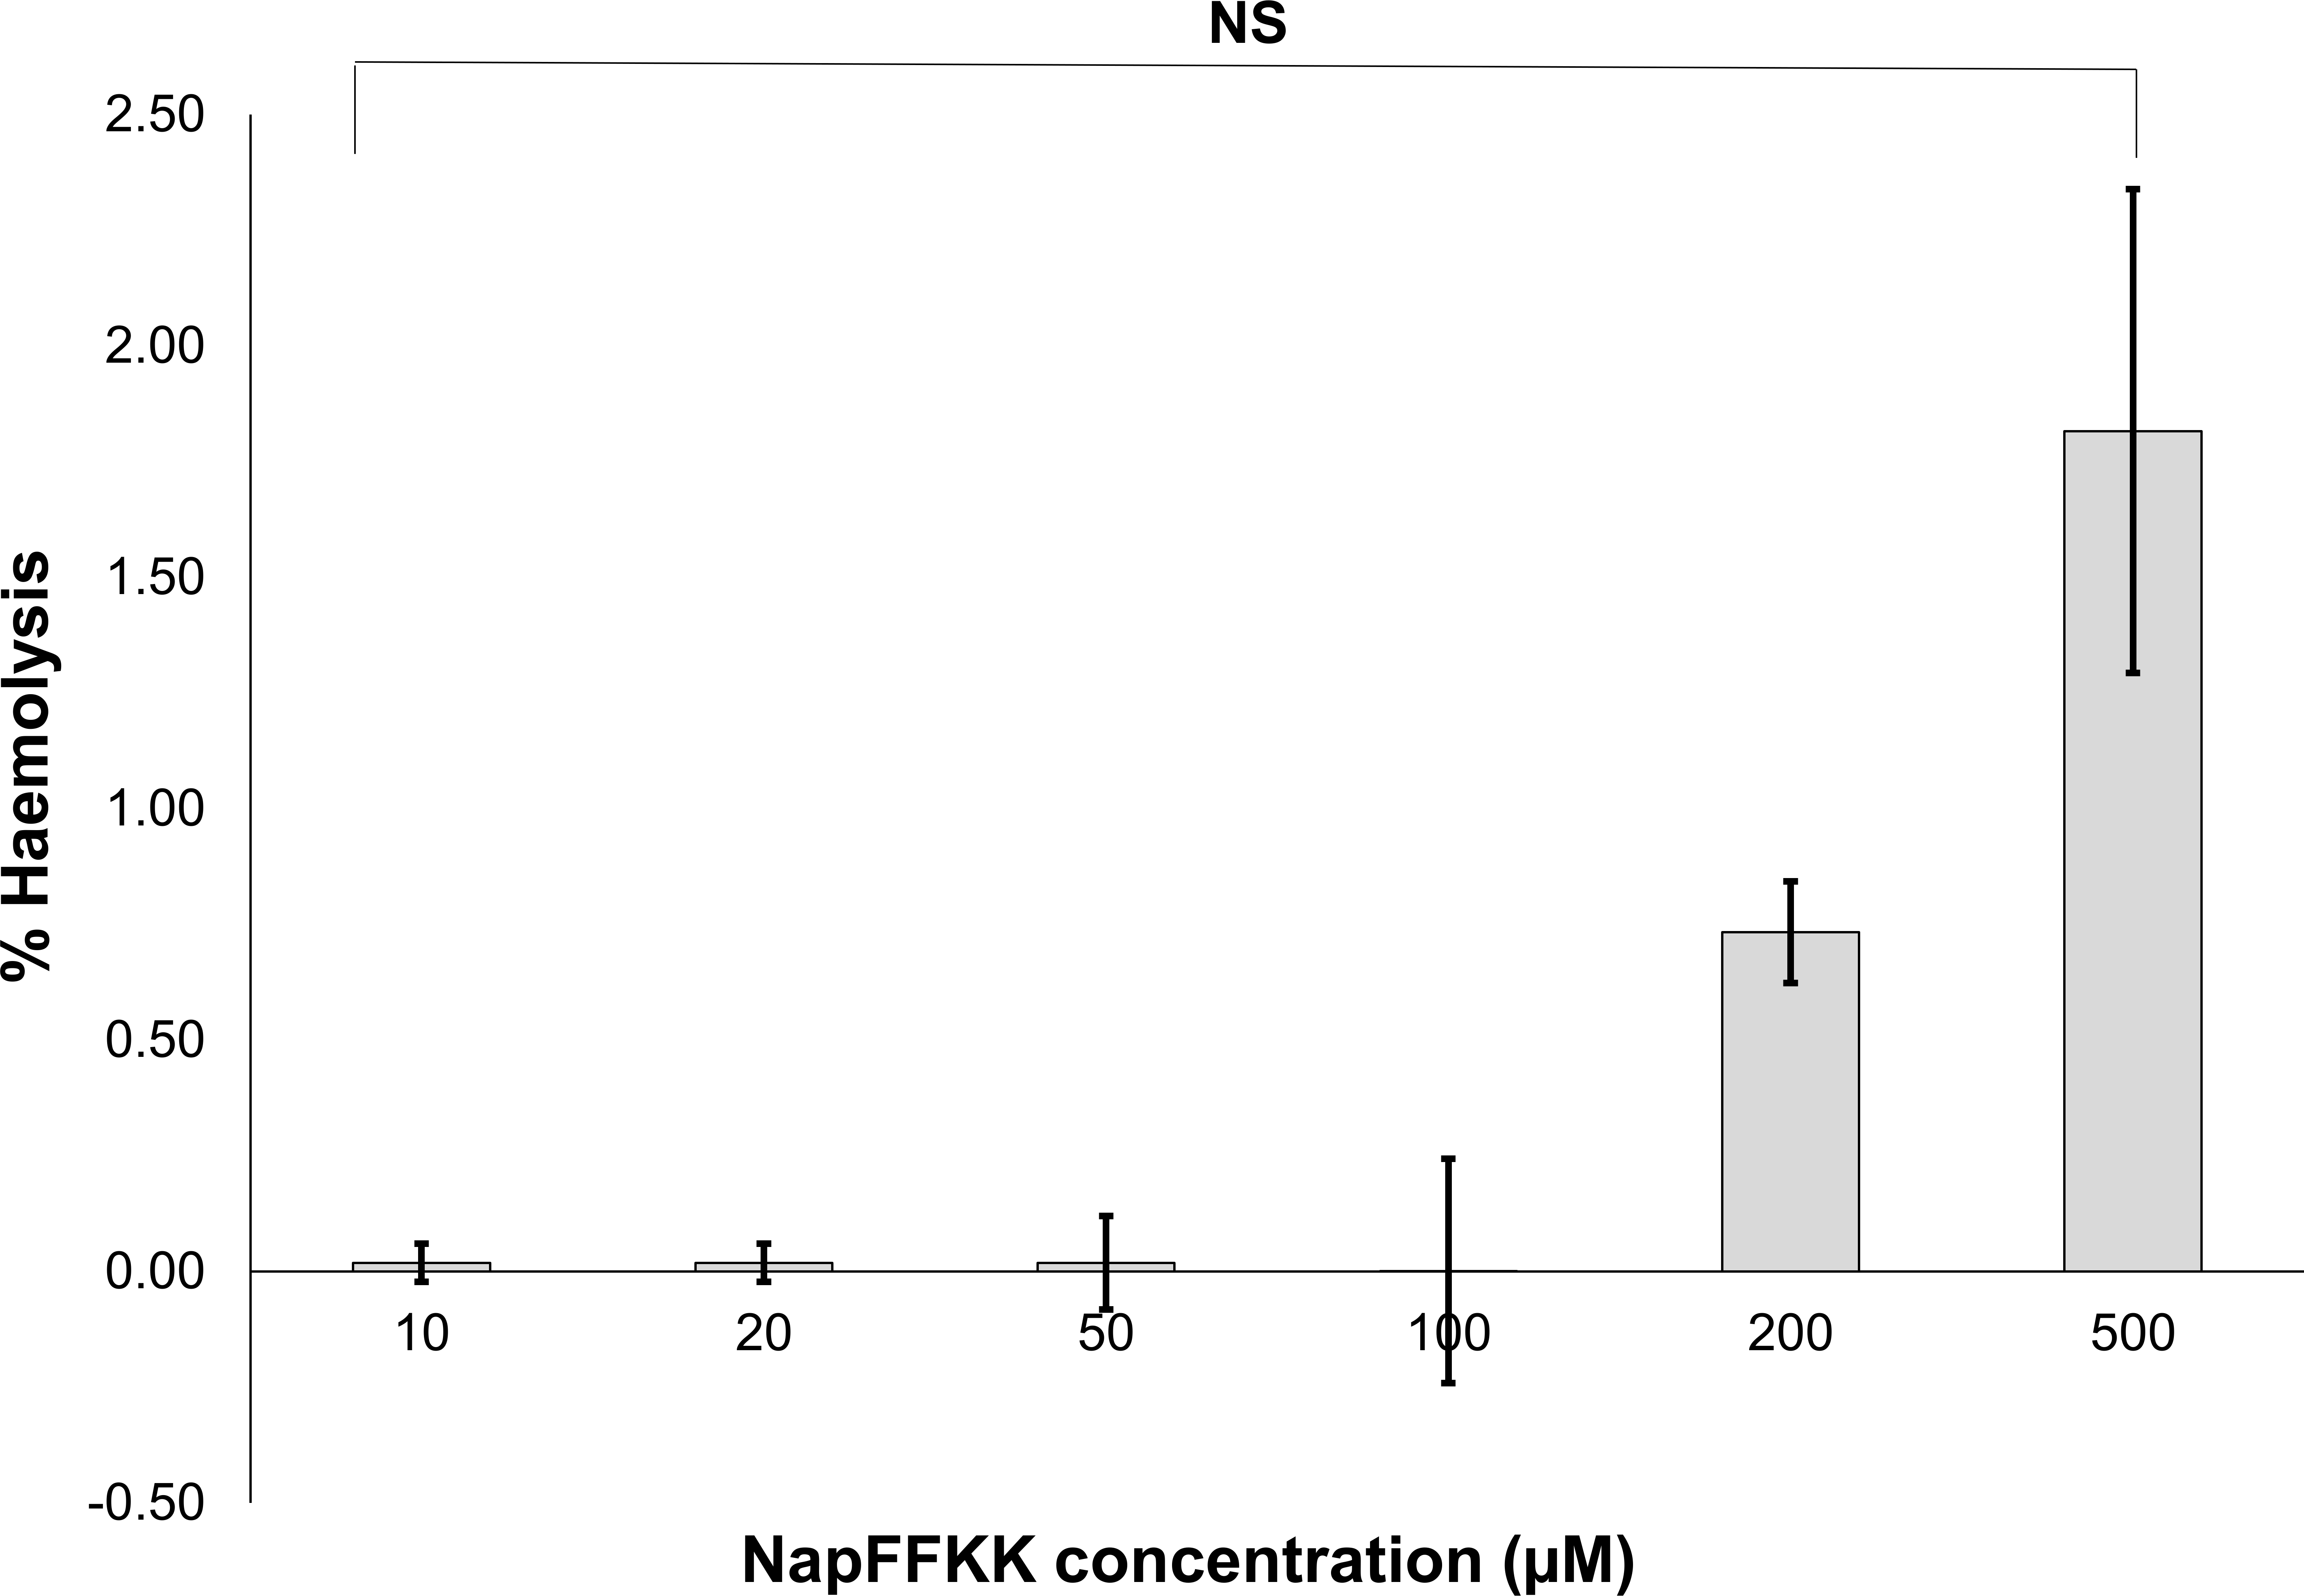


Figure S5. Percentage haemolysis of equine erythrocytes after 1 hour exposure to varying concentrations of NapFFKK-OH. Key: NS: no significant difference (p≥0.05) between the peptide nanotubes and the negative control (PBS).


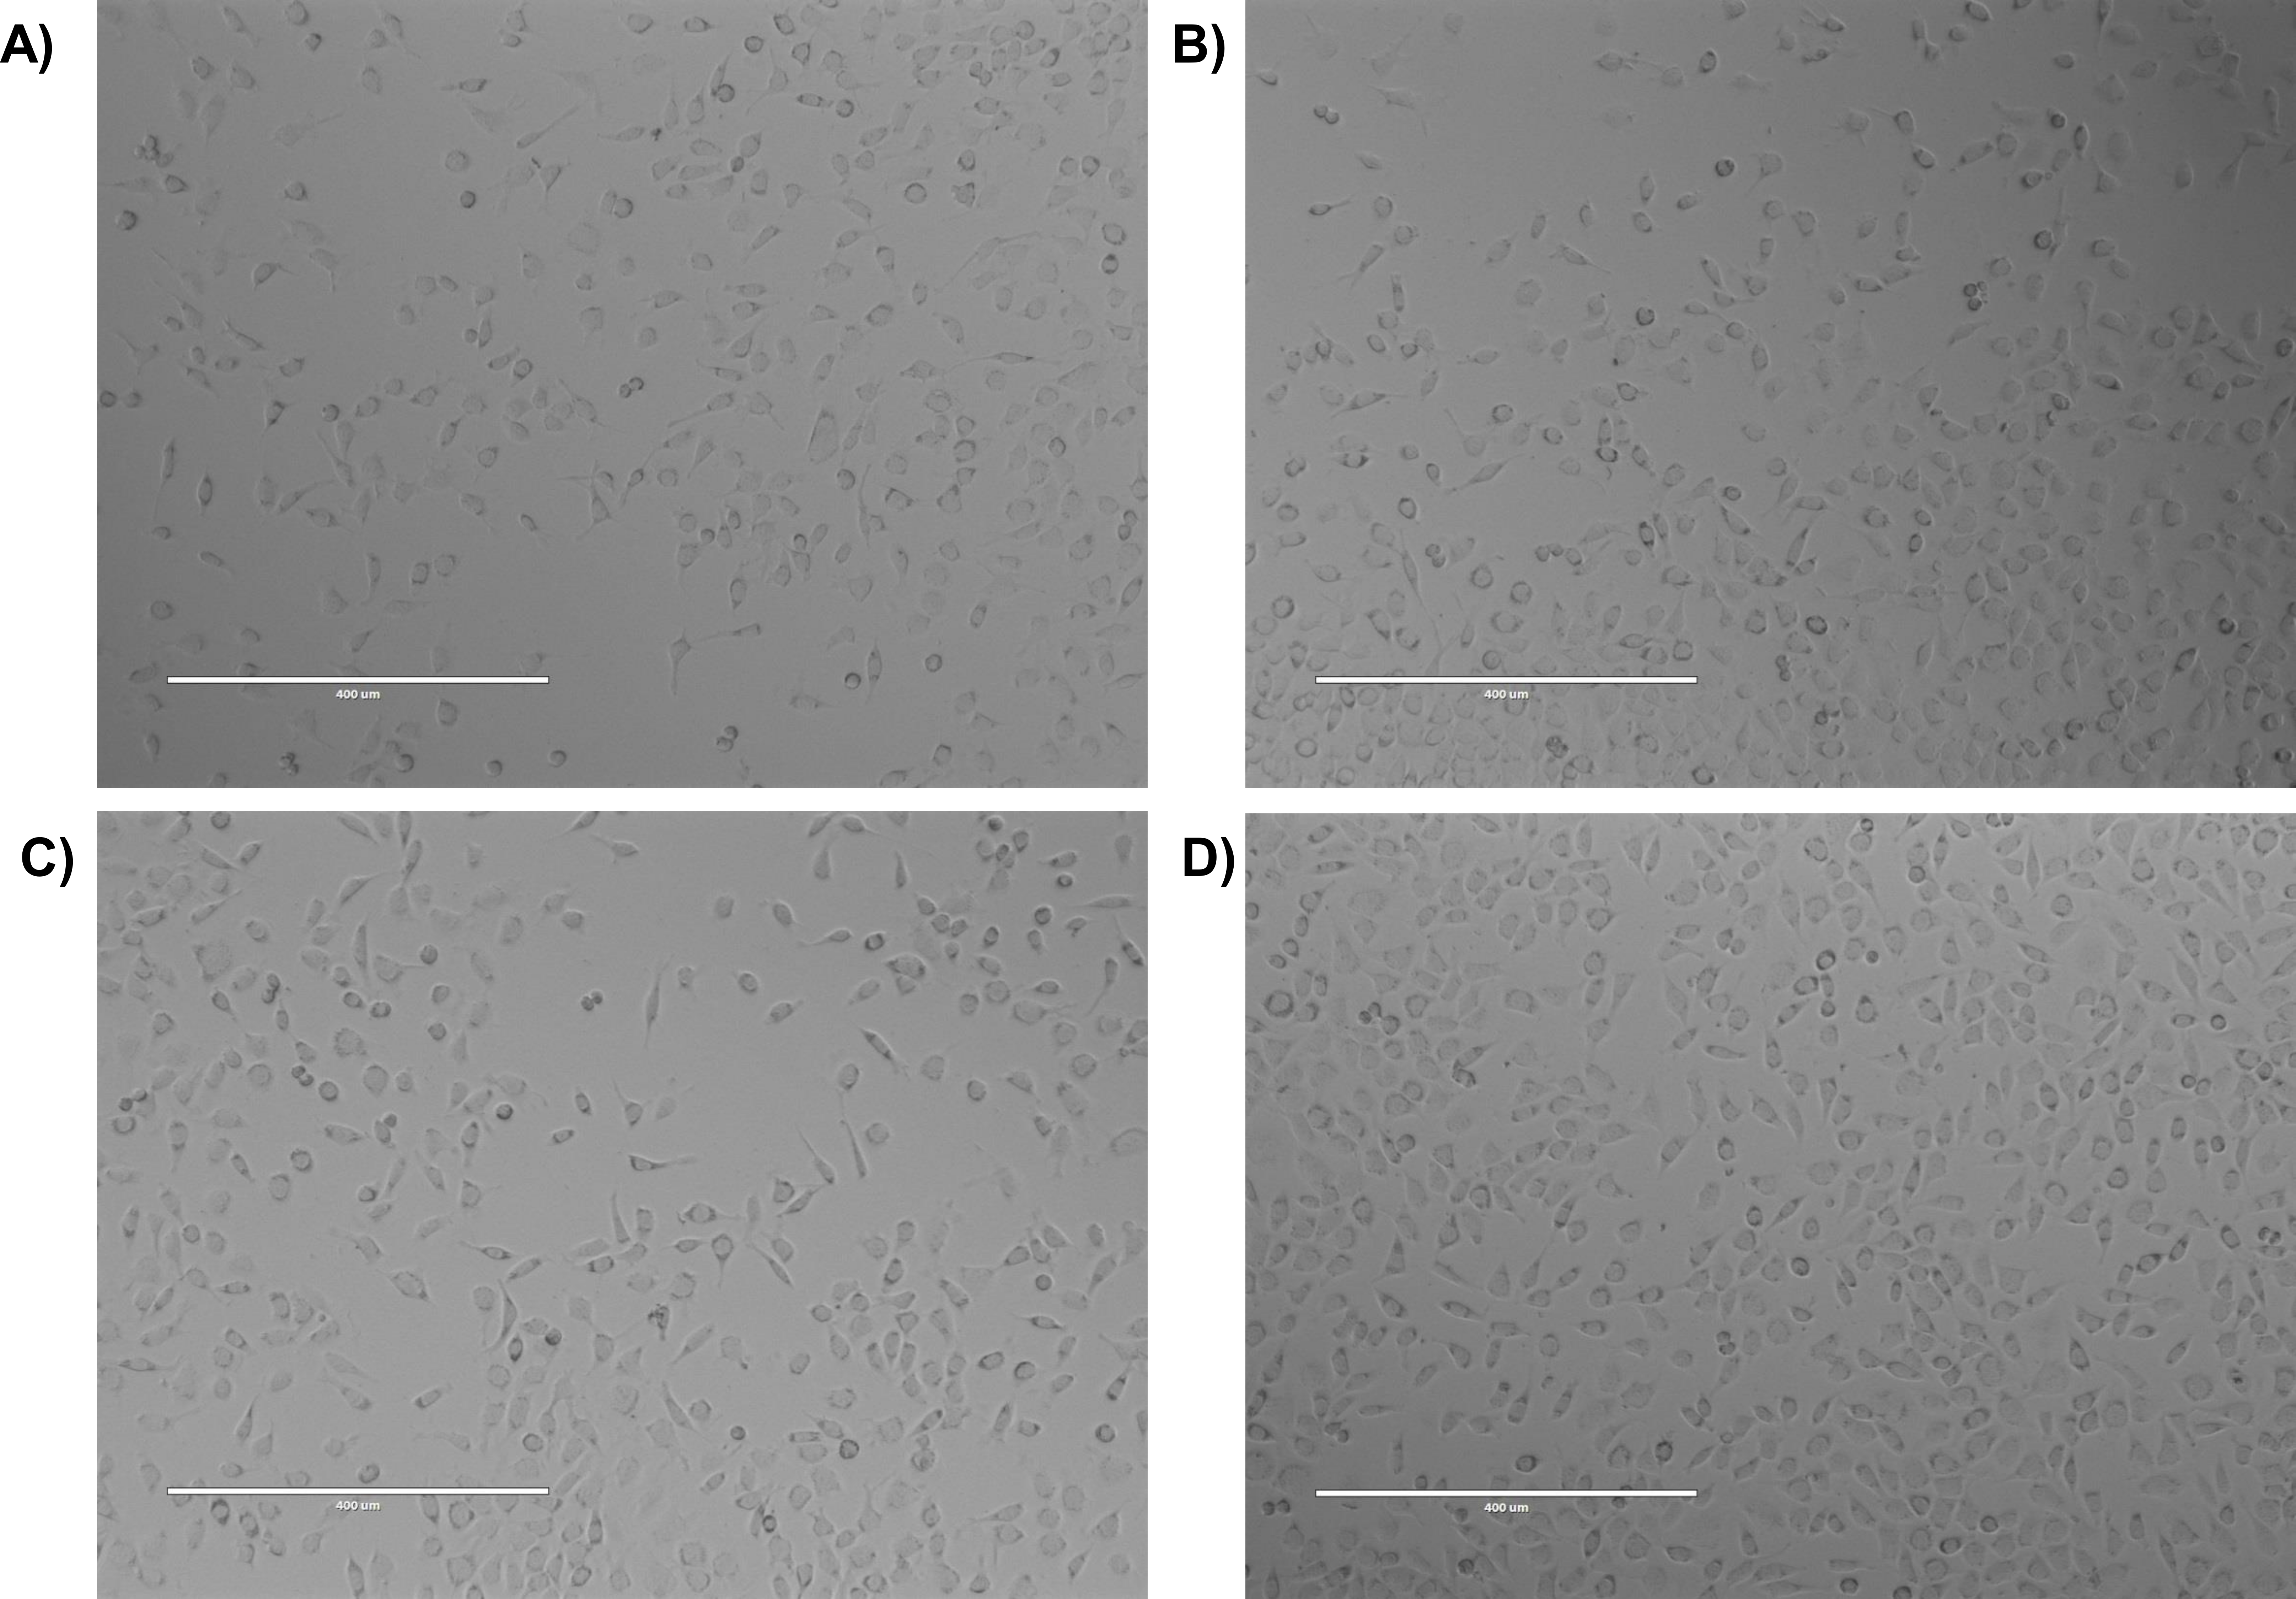
Figure S6. Optical images of NCTC 929 cells with (**A**) 20 µM; (**B**) 100 µM; (**C**) 200 µM; (**D**) 500 µM of NapFFKK-OH. Each image was taken after 24 hours incubation with NapFFKK-OH, scale bar = 400 µm.
